# Supplementary material for: Prevalence of Hypertension in the Middle Belt of Ghana: A Community-Based Screening Study
Source: Hindawi journal article supplement (doi:10.1155/2019/1089578), 2019-10-07
Supplement: f1 [file 1089578.f1.pdf]

Supplementary 1: The relationship between respondents being hypertensive and various risk factors.

| Factor                                        | Respondent's Age group |                        |                           | P – Value         |
|-----------------------------------------------|------------------------|------------------------|---------------------------|-------------------|
|                                               | 18 – 39 years<br>N=150 | 40 – 59 years<br>N=309 | ≥60 years<br>N=258        |                   |
|                                               | n (%)                  | n (%)                  | n (%)                     |                   |
| <b>Being hypertensive and tobacco use</b>     |                        |                        |                           |                   |
| <b>Current smokers</b>                        | 0 (0.0)                | 10 (3.2)               | 4 (1.6)                   | <b>0.053</b>      |
| <b>Past tobacco users</b>                     | 5 (3.3)                | 22 (7.1)               | 34 (13.2)                 | <b>0.001</b>      |
| <b>Any smokeless tobacco users</b>            | 3 (2.0)                | 2 (0.6)                | 1 (0.4)                   | <b>0.201</b>      |
| <b>Being hypertensive and alcohol use</b>     |                        |                        |                           |                   |
|                                               | 18 – 39 years<br>N=150 | 40 – 59 years<br>N=309 | ≥60 years<br>N=258        | P – Value         |
| <b>Ever Consumed Alcohol</b>                  | 50 (33.3)              | 118 (38.2)             | 102 (39.5)                | <b>0.445</b>      |
| <b>Consumed Alcohol in the past 12 months</b> | 33 (22.0)              | 66 (21.4)              | 56 (21.7)                 | <b>0.987</b>      |
| <b>Consumed Alcohol in the past 30 Days</b>   | 28 (18.7)              | 57 (18.4)              | 48 (18.6)                 | <b>0.998</b>      |
| <b>Being hypertension and other factors</b>   |                        |                        |                           |                   |
|                                               | 18 – 39 years<br>N=150 | 40 – 59 years<br>N=309 | 60 & Above years<br>N=258 | P – Value         |
| <b>Vigorous work</b>                          | 141 (94.0)             | 288 (93.2)             | 180 (69.8)                | <b>&lt; 0.001</b> |
| <b>Active in Sports</b>                       | 52 (34.7)              | 68 (22.0)              | 34 (13.2)                 | <b>&lt;0.001</b>  |
| <b>Diabetic</b>                               | 8 (5.3)                | 34 (11.0)              | 27 (10.5)                 | <b>0.131</b>      |
| <b>Pre – Diabetes</b>                         | 9 (6.0)                | 37 (12.0)              | 18 (7.0)                  | <b>0.042</b>      |
| <b>BMI</b>                                    |                        |                        |                           |                   |
| <b>Underweight</b>                            | 9 (6.0)                | 27 (8.7)               | 50 (19.4)                 |                   |
| <b>Normal</b>                                 | 84 (56.0)              | 166 (53.7)             | 150 (58.1)                | <b>&lt;0.001</b>  |
| <b>Overweight</b>                             | 40 (26.7)              | 69 (22.3)              | 32 (12.4)                 |                   |

|                               |                             |           |            |            |              |
|-------------------------------|-----------------------------|-----------|------------|------------|--------------|
|                               | <b>Obese</b>                | 17 (11.3) | 47 (15.2)  | 26 (10.1)  |              |
| <b>Fasting Blood Glucose</b>  |                             |           |            |            |              |
|                               | <b>Normal</b>               | 83 (55.3) | 131 (42.4) | 117 (45.3) |              |
|                               | <b>Hypoglycemia</b>         | 4 (2.7)   | 11 (3.6)   | 3 (1.2)    | <b>0.038</b> |
|                               | <b>Hyperglycemia</b>        | 63 (42.0) | 167 (54.0) | 138 (53.5) |              |
| <b>Blood Cholesterol</b>      |                             |           |            |            |              |
|                               | <b>Normal</b>               | 82 (55.0) | 132 (43.8) | 92 (37.2)  |              |
|                               | <b>Hypocholesterolemia</b>  | 3 (2.0)   | 4 (1.3)    | 7 (2.8)    | <b>0.010</b> |
|                               | <b>Hypercholesterolemia</b> | 64 (42.9) | 165 (54.8) | 148 (59.9) |              |
| <b>Triglycerides in Blood</b> |                             |           |            |            |              |
|                               | <b>Normal</b>               | 82 (55.8) | 146 (48.5) | 112 (44.4) |              |
|                               | <b>Hypotriglyceridemia</b>  | 1 (0.7)   | 1 (0.3)    | 1 (0.4)    | <b>0.267</b> |
|                               | <b>Hypertriglyceridemia</b> | 64 (43.5) | 154 (51.2) | 139 (55.2) |              |
| <b>Proteinuria (g/L)</b>      |                             |           |            |            |              |
|                               | <b>Negative</b>             | 94 (63.1) | 219 (71.1) | 164 (63.8) |              |
|                               | <b>Trace</b>                | 49 (32.9) | 83 (26.9)  | 80 (31.1)  |              |
|                               | <b>0.3</b>                  | 4 (2.7)   | 2 (0.6)    | 7 (2.7)    | <b>0.088</b> |
|                               | <b>1.0</b>                  | 2 (1.3)   | 0 (0.0)    | 4 (1.6)    |              |
|                               | <b>3.0</b>                  | 0 (0.0)   | 0 (0.0)    | 1 (0.4)    |              |
|                               | <b>Greater or equal 20</b>  | 0 (0.0)   | 4 (1.3)    | 1 (0.4)    |              |
